# Supplementary material for: Genomic Characterization of Haemophilus parasuis SH0165, a Highly Virulent Strain of Serovar 5 Prevalent in China
Source: PLoS One. 2011 May 17;6(5):e19631. doi: 10.1371/journal.pone.0019631 (PMC3096633; doi:10.1371/journal.pone.0019631)
Supplement: Table S2 — Genes coding for proteins related to regulatory functions of strain SH0165. (XLS) [file pone.0019631.s002.xls]

## Sheet: Table S2
Table S2. Genes coding for proteins related to regulatory functions of strain SH0165.
H. parasuis	Name	Function	H. somnus	H. influenzae	H. ducreyi	A. pleuropneumoniae	P. multocida
HAPS_0014	lexA	LexA repressor/SOS-response transcriptional repressors (RecA-mediated autopeptidases)	HS_0386	HI_0749	HD_0545	APJL_1127	PM1181
HAPS_0033	acrR	transcriptional regulator acrR protein	-	-	-	-	-
HAPS_0052	HAPS_0052	HTH-type transcriptional regulator, BadM/Rrf2 family	HS_0280	HI_0379	HD_1080	APJL_0942	PM0317
HAPS_0110	mraZ	cell division protein MraZ, possible DNA-binding transcription factor	HS_0349	HI_1129	-	APJL_0010	PM0133
HAPS_0167	fnr	fumarate/nitrate reduction transcriptional regulator	HS_0878	HI_1425	HD_1427	APJL_0646	PM0668
HAPS_0195	agaR	transcriptional repressor AgaR/DNA-binding transcriptional dual regulator	-	-	-	-	-
HAPS_0207	HAPS_0207	putative HTH-type transcriptional regulator	-	HI_1364	-	APJL_0695	-
HAPS_0215	rseB	periplasmic negative regulator of sigmaE	-	-	-	-	-
HAPS_0216	rseC	sigma-E factor regulatory protein	-	-	HD_1174	APJL_0417	-
HAPS_0251	trpR	tryptophan operon repressor TrpR	HS_1090	HI_0830	-	APJL_0504	PM0325
HAPS_0308	HAPS_0308	transcriptional regulator-like protein, helix-turn-helix domain-containing protein	-	-	-	-	-
HAPS_0309	HAPS_0309	XRE family transcriptional regulator	-	-	-	-	-
HAPS_0319	lrp	leucine-responsive transcriptional regulator	HS_1187	HI_1596	HD_1477	APJL_0612	PM0254
HAPS_0330	sirA	SirA protein/redox protein, regulator of disulfide bond formation	-	-	-	-	-
HAPS_0340	cpxA	two-component sensor protein/signal transduction histidine kinase	-	-	HD_1470	APJL_0622	-
HAPS_0341	cpxR	transcriptional regulatory protein CpxR/response regulators consisting of a CheY-like receiver domain and a winged-helix DNA-binding domain	-	HI_0837	HD_1469	APJL_0623	PM1887
HAPS_0390	mlc	transcriptional repressor of carbohydrate metabolism	-	-	HD_1479	APJL_0610	PM0642
HAPS_0396	sspB	stringent starvation protein B/ClpXP protease specificity-enhancing factor	-	HI_1440	HD_1426	APJL_0647	-
HAPS_0397	sspA	stringent starvation protein A/glutathione S-transferase	HS_0754	HI_1441	HD_1425	APJL_0648	PM0522
HAPS_0407	HAPS_0407	putative HTH-type transcriptional regulator	HS_0696	HI_0143	HD_1380	APJL_0705	PM1714
HAPS_0433	HAPS_0433	predicted transcription regulator containing HTH domain	-	-	-	-	-
HAPS_0464	csrA	carbon storage regulator	-	HI_0813	HD_1430	APJL_0643	PM1288
HAPS_0480	arcB	aerobic respiration control sensor protein ArcB	-	-	-	-	-
HAPS_0513	fic1	filamentation induced by cAMP protein Fic	-	-	-	-	-
HAPS_0514	HAPS_0514	predicted helix-turn-helix containing protein	-	-	-	-	-
HAPS_0522	purR	DNA-binding transcriptional repressor PurR	HS_1032	HI_1635	HD_1641	APJL_0826	PM0547
HAPS_0690	HAPS_0690	phosphate transport regulator	HS_1190	HI_1603	HD_1371	APJL_0718	PM0250
HAPS_0719	rseA	sigma-E factor negative regulatory protein	-	HI_0629	HD_1173	APJL_0416	PM1788
HAPS_0732	relA	GTP pyrophosphokinase	HS_0095	HI_0334	HD_1185	-	PM1865
HAPS_0740	bolA	morphology/transcription regulator BolA family protein	HS_1168	HI_1082	HD_0254	APJL_1300	PM0179
HAPS_0741	rsbV	putative anti-sigma factor B antagonist	-	-	HD_0255	APJL_1301	-
HAPS_0786	glpR	glycerol-3-phosphate regulon repressor	HS_0515	HI_0619	HD_1648	APJL_0830	PM1439
HAPS_0822	HAPS_0822	transcriptional regulator/helix-turn-helix domain-containing protein	HS_0670	-	-	-	-
HAPS_0953	HAPS_0953	transcriptional regulator	-	-	-	-	-
HAPS_0980	argR	arginine repressor	HS_1056	HI_1209	HD_0262	APJL_1308	PM0549
HAPS_0993	cyaA	adenylate cyclase	HS_0043	-	HD_0613	APJL_1072	PM1811
HAPS_1001	malT	ATP-dependent transcriptional regulator	-	-	-	APJL_1245	-
HAPS_1016	ilvY	DNA-binding transcriptional regulator IlvY	-	HI_0681	-	APJL_0998	PM1283
HAPS_1033	spoT	guanosine polyphosphate pyrophosphohydrolase/synthetase	HS_1455	HI_1741	-	-	PM0920
HAPS_1104	HAPS_1104	XRE family transcriptional regulator	-	-	-	-	-
HAPS_1173	aslB	arylsulfatase regulator (Fe-S oxidoreductase)	-	-	-	-	PM0600
HAPS_1185	recX	regulatory protein RecX	-	-	HD_0411	APJL_1162	-
HAPS_1203	scrR	sucrose operon repressor	-	-	-	APJL_2083	PM1847
HAPS_1204	tyrR	transcriptional regulatory protein TyrR	-	-	-	APJL_0803	-
HAPS_1212	hfq	RNA-binding protein Hfq	HS_1105	HI_0411	HD_0741	APJL_2008	PM0906
HAPS_1246	sfsA	regulator for maltose metabolism	HS_0231	HI_1611	-	APJL_1773	PM0754
HAPS_1275	opsX	ADP-heptose:LPS heptosyltransferase I	-	HI_0261	HD_0445	APJL_0187	PM1302
HAPS_1304	glnB	nitrogen regulatory protein P-II	HS_1355	HI_0337	HD_0062	APJL_1544	PM2004
HAPS_1324	fic2	filamentation induced by cAMP protein Fic	HS_0216	-	-	-	-
HAPS_1347	sprT	putative SprT-like protein	HS_1624	HI_1173	HD_0875	APJL_1281	PM1026
HAPS_1390	HAPS_1390	transcriptional regulator	-	-	-	-	-
HAPS_1486	HAPS_1486	sugar metabolism within DeoR family transcriptional regulator	HS_1537	-	-	APJL_1665	-
HAPS_1514	arcA	aerobic respiration control protein ArcA/two-component response regulator, DNA-binding response regulator in two-component regulatory system with ArcB or CpxA	HS_0713	HI_0884	HD_0278	APJL_0049	PM0219
HAPS_1522	fucR	L-fucose operon activator	HS_1446	HI_0615	-	APJL_1715	-
HAPS_1530	rpiR	RpiR family transcriptional regulator	HS_0304	-	-	-	-
HAPS_1579	HAPS_1579	XRE family transcriptional regulator	HS_0535	-	-	-	-
HAPS_1591	HAPS_1591	XRE family transcriptional regulator	-	-	-	-	-
HAPS_1628	rbsR	ribose operon repressor	HS_0226	HI_0506	HD_1641	APJL_1699	PM0151
HAPS_1638	HAPS_1638	transcriptional regulator, AraC family	-	-	-	-	-
HAPS_1641	HAPS_1641	LysR family transcriptional regulator	-	-	-	APJL_1206	-
HAPS_1654	HAPS_1654	regulator of membrane protease activity	HS_0572	-	-	-	PM0888
HAPS_1721	HAPS_1721	HxlR family transcriptional regulator	-	-	-	-	-
HAPS_1738	HAPS_1738	possible transcriptional regulator	-	-	-	APJL_1781	-
HAPS_1759	HAPS_1759	MarR family transcriptional regulator	-	-	-	-	-
HAPS_1789	gntR	HTH-type transcriptional regulator	HS_0298	-	-	APJL_1698	PM0791
HAPS_1804	oxyR	DNA-binding transcriptional regulator OxyR, hydrogen peroxide-inducible genes activator	HS_0036	HI_0571	HD_0699	APJL_1506	PM1346
HAPS_1810	iclR	transcriptional regulator IclR	HS_0758	HI_1032	-	APJL_0109	PM1257
HAPS_1821	HAPS_1821	XRE family transcriptional regulator	-	-	-	-	-
HAPS_1822	hipA1	HipA-like protein, regulator with hipB	-	-	-	-	-
HAPS_1825	HAPS_1825	LysR family transcriptional regulator	-	-	-	APJL_0793	-
HAPS_1830	HAPS_1830	MerR family transcriptional regulator	-	-	-	-	PM1941
HAPS_1832	HAPS_1832	MerR family transcriptional regulator, heavy metal-dependent	-	HI_0293	-	APJL_1273	-
HAPS_1846	hipB	transcriptional regulator	-	-	-	-	-
HAPS_1847	hipA2	HipA protein, co-regulate with HipB	-	-	-	-	-
HAPS_1864	glpR	glycerol-3-phosphate regulon repressor	HS_0011	HI_1009	-	-	PM1367
HAPS_1904	HAPS_1904	transcriptional regulator	-	-	-	APJL_1739	-
HAPS_1920	HAPS_1920	transcriptional regulator	-	-	-	APJL_0962	-
HAPS_1960	asnC	DNA-binding transcriptional regulator AsnC	HS_1441	HI_0563	HD_1911	APJL_1877	PM1573
HAPS_1974	nadR	nicotinamide-nucleotide adenylyltransferase	HS_0087	HI_0763	-	APJL_0047	PM1387
HAPS_1986	fic3	filamentation induced by cAMP protein Fic	HS_1262	-	-	-	-
HAPS_2035	HAPS_2035	XRE family transcriptional regulator	-	-	-	-	-
HAPS_2043	crp	catabolite gene activator (cAMP receptor protein)	HS_0139	HI_0957	HD_0738	APJL_2012	PM1157
HAPS_2054	qseB	two component transcriptional regulator/response regulator consisting of a CheY-like receiver domain and a winged-helix DNA-binding domain	-	HI_1708	-	APJL_1079	PM0214
HAPS_2055	qseC	sensor protein QseC/integral membrane sensor signal transduction histidine kinase	-	HI_1707	-	APJL_1080	PM0215
HAPS_2077	metJ	transcriptional repressor protein MetJ	HS_0469	HI_0294	HD_0675	APJL_1964	PM1290
HAPS_2089	HAPS_2089	bacteriophage transcriptional regulator	-	-	-	-	-
HAPS_2112	gcvA	DNA-binding transcriptional activator GcvA	HS_0495	HI_1194	HD_1028	APJL_0132	PM0567
HAPS_2114	cysB	HTH-type transcriptional regulator CysB	HS_1033	HI_1200	HD_1030	APJL_0134	PM0660
HAPS_2116	icc	cyclic 3',5'-adenosine monophosphate phosphodiesterase	HS_0581	HI_0399	HD_0749	APJL_1988	PM1019
HAPS_2146	rsaL	DNA-binding protein, virulence gene repressor RsaL	-	-	-	-	-
HAPS_2174	HAPS_2174	XRE family transcriptional regulator	-	-	-	-	-
HAPS_2186	uhpB	sensory histidine kinase UhpB/signal transduction histidine kinase, glucose-6-phosphate specific	-	-	-	-	PM1339
HAPS_2191	metR	LysR family transcriptional regulator	HS_1054	HI_1739	-	APJL_1177	PM0421
HAPS_2265	proQ	putative solute/DNA competence effector, activator of osmoprotectant transporter ProP	-	-	HD_1009	APJL_0120	-
