# Supplementary material for: Genomic Characterization of Haemophilus parasuis SH0165, a Highly Virulent Strain of Serovar 5 Prevalent in China
Source: PLoS One. 2011 May 17;6(5):e19631. doi: 10.1371/journal.pone.0019631 (PMC3096633; doi:10.1371/journal.pone.0019631)
Supplement: Table S5 — Putative protease-encoding genes in the H. parasuis SH0165 genome. (XLS) [file pone.0019631.s005.xls]

## Sheet: Table S3
Table S5. Putative protease-encoding genes in the H. parasuis SH0165 genome.
H. parasuis	Name	Function	H. somnus	H. influenzae	H. ducreyi	A. pleuropneumoniae	P. multocida
HAPS0182	clpB	ATP-dependant Clp protease chain B/ATPases with chaperone activity	HS0199	HI0859	HD0565	APJL1103	PM1704
HAPS0184	-	metalloprotease	HS1036	HI0409	HD1339	APJL0484	PM0243
HAPS0343	pepP	Xaa-Pro aminopeptidase	HS0682	HI0816	HD1418	APJL0653	PM1724
HAPS0440	-	metalloprotease	HS0346	HI0004	HD1387	APJL0692	PM1045
HAPS0462	degS	protease DegS precursor	HS1049	HI0945	HD1350	APJL0744	PM0748
HAPS0483	-	ATP-dependent Lon protease	HS0471	HI0725	HD1705	APJL0983	PM1834
HAPS0648	-	putative serine protease	-	-	-	-	-
HAPS0810	htpX	heat shock protein HtpX	HS0930	HI0720	HD0353	APJL1057	PM0468
HAPS1009	ptrA	protease III	-	-	HD0187	APJL1926	-
HAPS1011	lon	ATP-dependent protease LA	HS0489	HI0462	HD1149	APJL0394	PM1978
HAPS1248	hslV	ATP-dependent protease peptidase subunit	HS1541	HI0496	HD2006	APJL1772	PM1749
HAPS1249	hslU	ATP-dependent protease ATP-binding subunit	HS1542	HI0497	HD2007	APJL1771	PM1748
HAPS1265	yaeL	putative zinc metalloprotease	HS0981	HI0918	HD1192	APJL0436	PM1991
HAPS1281	prlC	Zn-dependent oligopeptidase	HS0791	HI0214	HD0988	APJL1052	PM0680
HAPS1321	htpX	Zn-dependent protease with chaperone function	HS1514	-	-	APJL1942	PM1190
HAPS1368	sohB	putative periplasmic protease, secreted serine protease	HS0841	HI1682	HD0845	APJL0009	PM0585
HAPS1389	pepB	aminopeptidase B	HS0388	-	HD1169	APJL0409	PM1029
HAPS1419	pepA	leucyl aminopeptidase	HS0516	HI1705	HD0555	APJL1116	PM0195
HAPS1420	prtC	collagenase prtC/related protease involved in cellular process and singaling	HS1323	HI0419	HD0455	APJL1149	PM0233
HAPS1421	pepO	neutral endopeptidase	-	-	HD0191	APJL1960	-
HAPS1465	pepD	aminoacyl-histidine dipeptidase	HS0004	HI0675	HD1832	APJL0262	PM1368
HAPS1473	htrA	periplasmic serine protease do/hhoA-like precursor	HS0816	HI1259	HD0260	APJL1306	PM0734
HAPS1818	tldD1	protease involved in Microcin B17 maturation and in sensitivity to the DNA gyrase inhibitor LetD	HS0276	-	HD0015	APJL1567	PM0343
HAPS1843	tldD2	protease involved in Microcin B17 maturation and in sensitivity to the DNA gyrase inhibitor LetD	HS0276	-	HD0015	APJL1567	PM0343
HAPS1862	gst	glutathione S-transferase	-	HI0111	-	APJL1550	-
HAPS1928	pepT	peptidase T	-	-	-	-	-
HAPS1935	gcp	O-sialoglycoprotein endopeptidase	HS0411	HI0530	HD0471	APJL1139	PM1238
HAPS2006	clpP	ATP-dependent Clp protease proteolytic subunit ClpP	HS1432	HI0714	HD0221	APJL1292	PM1976
HAPS2007	clpX	ATP-dependent protease ATP-binding subunit	HS1433	HI0715	HD0218	APJL1291	PM1977
HAPS2032	-	metallopeptidase peptidase	-	-	-	-	-
HAPS2122	sppA	protease IV, signal peptide peptidase	HS0908	HI1541	HD0878	APJL1279	PM0671
HAPS2161	hflC	protein HflC/membrane protease subunit, stomatin/prohibitin-like protein	HS0488	HI0150	HD1808	APJL1092	PM0118
HAPS2162	hflK	protein HflK/membrane protease subunit, stomatin/prohibitin-like protein	HS0487	HI0151	HD1809	APJL1093	PM0117
HAPS2192	pepQ	Xaa-Pro dipeptidase	-	-	-	APJL0091	-
HAPS2198	pepN	aminopeptidase N	HS0884	HI1614	HD0976	APJL1358	PM0618
HAPS2241	lonH	possible S16 family lon protease, ATP-dependent protease	HS0858	HI1324	HD0179	APJL1933	-
HAPS2266	prc	S41 family carboxy-terminal protease/periplasmic protease	HS1071	HI1668	HD1010	APJL0121	PM0269
